# Supplementary material for: Synthesis and crystal structure of the simultaneous binding of Ni(ii) cation and chloride by the protonated 2,4,6 tris-(2-pyridyl)-1,3,5 triazine ligand: theoretical investigations of anion⋯π, π⋯π and hydrogen bonding interactions
Source: Royal Society of Chemistry journal article supplement (doi:10.1039/d1nj01880a), 2021-01-01
Supplement: d1nj01880a1.pdf [file d1nj01880a1.pdf]

## Electronic Supplementary Information

### **Synthesis, crystal structure of the simultaneous binding of Ni(II) cation and chloride by the protonated 2,4,6 tris-(2-pyridyl)-1,3,5 triazine ligand: Theoretical investigations of anion $\cdots\pi$ , $\pi\cdots\pi$ and hydrogen bonding interactions**

Pampi Pal,<sup>a</sup> Kinsuk Das<sup>\*,b</sup>, Anowar Hossain,<sup>a</sup> Rosa M. Gomila<sup>c</sup>, Antonio Frontera<sup>\*,d</sup>, and Subrata Mukhopadhyay<sup>\*,a</sup>

<sup>a</sup>*Department of Chemistry, Jadavpur University, Kolkata 700032, India*

<sup>b</sup>*Department of Chemistry, Chandernagore College, Hooghly, West Bengal 712136, India*

<sup>c</sup>*Serveis Científic-Tècnics, Universitat de les IllesBalears, Crta. de Valldemossa km 7.5, Palma 07122, Balears, Spain*

<sup>d</sup>*Departament de Química, Universitat de les IllesBalears, Crta. de Valldemossa km 7.5, Palma 07122, Balears, Spain*

### **Contents of the Supporting Information**

|           |                                                                                                                                                                                                                                                                                                                                  |         |
|-----------|----------------------------------------------------------------------------------------------------------------------------------------------------------------------------------------------------------------------------------------------------------------------------------------------------------------------------------|---------|
| Table S1  | Selected crystallographic features of structure <b>1</b>                                                                                                                                                                                                                                                                         | Page S2 |
| Table S2  | Coordination bond distances (Å) and angles (°) for <b>1</b>                                                                                                                                                                                                                                                                      | Page S3 |
| Table S3  | Details of Hydrogen bond distances (Å) and angles (°) for <b>1</b>                                                                                                                                                                                                                                                               | Page S3 |
| Table S4  | Geometric features (distances in Å and angles in degrees) of $\pi\cdots\pi$ interactions obtained for <b>1</b>                                                                                                                                                                                                                   | Page S4 |
| Scheme S1 | Schematic representation of the possible coordination modes of the ligand ' <b>tptz</b> '                                                                                                                                                                                                                                        | Page S5 |
| Scheme S2 | <b>[a]</b> Availability and the nature of coronation pockets in <b>tptz</b><br><b>[b]</b> Schematic representation of steric constrain of the protonated ligand ( <b>Htptz</b> <sup>+</sup> ) executed by the hydrogen atoms on the approach of second metal ion (M2) when it is already coordinated to the first metal ion (M1) | Page S5 |
| Scheme S3 | Schematic representation of the synthesis of complex <b>1</b>                                                                                                                                                                                                                                                                    | Page S6 |
| Figure S1 | IR spectrum for Complex <b>1</b>                                                                                                                                                                                                                                                                                                 | Page S6 |
| Figure S2 | UV-Visible spectrum for Complex <b>1</b>                                                                                                                                                                                                                                                                                         | Page S7 |
| Figure S3 | TG curve for complex <b>1</b>                                                                                                                                                                                                                                                                                                    | Page S7 |

**Table S1.** Selected crystallographic features of structure **1**

| Compound                                          | <b>1</b>                                       |
|---------------------------------------------------|------------------------------------------------|
| Empirical formula                                 | $C_{18}H_{21}Cl_3N_6NiO_4$                     |
| Formula weight                                    | 550.47                                         |
| Temperature (K)                                   | 150 (2) K                                      |
| Wavelength (Å )                                   | 0.71073                                        |
| Crystal system                                    | Monoclinic                                     |
| Space group                                       | P 2 <sub>1</sub> /n                            |
| Unit cell dimensions                              |                                                |
| a (Å)                                             | 12.5147(10)                                    |
| b (Å)                                             | 14.4871(13)                                    |
| c (Å)                                             | 13.4749(11)                                    |
| $\alpha$ (°)                                      | 90                                             |
| $\beta$ (°)                                       | 107.825(2)                                     |
| $\gamma$ (°)                                      | 90                                             |
| Volume (Å <sup>3</sup> )                          | 2325.7(3)                                      |
| Crystal size (mm <sup>3</sup> )                   | 0.10x0.11x0.13                                 |
| z                                                 | 4                                              |
| Density <sub>cal</sub> ( Mgm <sup>-3</sup> )      | 1.572                                          |
| Absorption coefficient (mm <sup>-1</sup> )        | 1.216                                          |
| F(000)                                            | 1128                                           |
| $\theta$ Range (°) for data collection            | 2.1 – 27.1                                     |
| Index ranges                                      | -16 ≤ h ≤ 16<br>-18 ≤ k ≤ 18<br>-17 ≤ l ≤ 17   |
| Goodness-of-fit on F <sup>2</sup>                 | 1.049                                          |
| Independent reflections [R <sub>int</sub> ]       | 5038 (0.0407)                                  |
| Absorption correction                             | Multi-scan                                     |
| Refinement method                                 | Full-matrix least squares<br>on F <sup>2</sup> |
| Data/restraints/parameters                        | 5038/ 0/ 325                                   |
| Reflections collected                             | 34100                                          |
| Final R indices[ I > 2σ (I) ]                     | R=0.0246<br>wR <sub>2</sub> =0.0591            |
| Largest difference peak & hole(eÅ <sup>-3</sup> ) | -0.317, 0.292                                  |

**Table S2.** Coordination bond distances (Å) and angles (°) for **1**

| <b>Selected Bonds</b> | <b>Value (Å)</b> | <b>Selected Angles</b> | <b>(°)</b> |
|-----------------------|------------------|------------------------|------------|
| Ni1 - N1              | 2.1486(12)       | N1 - Ni1 - N2          | 76.62(4)   |
| Ni1 - N2              | 2.0010(11)       | N2 - Ni1 - N3          | 75.96(5)   |
| Ni1 - N3              | 2.1721(12)       | N1 - Ni1 - O1          | 85.35(5)   |
| Ni1 - O1              | 2.0726(13)       | N1 - Ni1 - O2          | 88.69(5)   |
| Ni1 - O2              | 2.0822(12)       | N1 - Ni1 - Cl1         | 106.6(3)   |
| Ni1 - Cl1             | 2.3072(4)        | N2 - Ni1 - O1          | 91.88(5)   |
|                       |                  | N2 - Ni1 - Cl1         | 176.55(4)  |
|                       |                  | N2 - Ni1 - O2          | 91.15(5)   |
|                       |                  | N3 - Ni1 - O1          | 94.38(6)   |
|                       |                  | N3 - Ni1 - O2          | 93.00(5)   |
|                       |                  | N3 - Ni1 - Cl1         | 100.83(3)  |
|                       |                  | N1 - Ni1 - N3          | 152.56(5)  |
|                       |                  | O1 - Ni1 - O2          | 172.51(5)  |
|                       |                  | O1 - Ni1 - Cl1         | 89.64(4)   |
|                       |                  | Cl1 - Ni1 - O2         | 87.72(4)   |

**Table S3.** Details of Hydrogen bond distances (Å) and angles (°) for **1**

| <b>D - H ... A</b> | <b>D (D - H)</b> | <b>D (HA)</b> | <b>D(D...A)</b> | <b>&lt;DHA</b> |
|--------------------|------------------|---------------|-----------------|----------------|
| N6-H5...Cl2        | 0.90(2)          | 2.32(2)       | 3.1405(15)      | 152.1(19)      |
| O1-H19...Cl2       | 0.84(2)          | 2.26(2)       | 3.0833(14)      | 166(2)         |
| O1-H20...Cl1       | 0.84(2)          | 2.26(2)       | 3.0980(14)      | 173.2(19)      |
| O2-H21...O4        | 0.82(2)          | 1.88(2)       | 2.694(2)        | 171(2)         |
| O2-H22...Cl3       | 0.80(2)          | 2.28(2)       | 3.0721(14)      | 175(2)         |
| O3-H23...Cl3       | 0.75(2)          | 2.49(2)       | 3.232(2)        | 169(2)         |
| O3-H24...Cl2       | 0.75(3)          | 2.39(3)       | 3.133(2)        | 171(3)         |
| O4-H25...O3        | 0.89(3)          | 1.99(3)       | 2.837(3)        | 159(3)         |
| O4-H26...Cl3       | 0.73(3)          | 2.39(3)       | 3.1020(17)      | 165(2)         |
| C2-H2...Cl2        | 0.9500           | 2.8200        | 3.6237(19)      | 143            |
| C3-H3...Cl1        | 0.9500           | 2.6000        | 3.4598(18)      | 150            |
| C4-H4...Cl2        | 0.9500           | 2.6600        | 3.6126(17)      | 177            |

**Table S4.** Geometric features (distances in Å and angles in degrees) of  $\pi\cdots\pi$  interactions obtained for **1**

| <b>Cg(ring I) - Cg(ring J)</b> | <b>Cg<math>\cdots</math>Cg (Å)</b> | <b>Cg(I) <math>\cdots</math>perp (Å)</b> | <b>Cg(J) <math>\cdots</math>perp (Å)</b> | <b><math>\alpha</math> (°)</b> | <b><math>\beta</math> (°)</b> | <b><math>\gamma</math> (°)</b> | <b>Symmetry</b>                                 |
|--------------------------------|------------------------------------|------------------------------------------|------------------------------------------|--------------------------------|-------------------------------|--------------------------------|-------------------------------------------------|
| Cg(3) $\cdots$ Cg(5)           | 3.6757(9)                          | 3.3674(6)                                | 3.4849(6)                                | 5.11(8)                        | 18.5                          | 23.6                           | $\frac{1}{2}+x, \frac{3}{2}-y, \frac{1}{2}+z$   |
| Cg(3) $\cdots$ Cg(6)           | 3.8936(10)                         | 3.5380(6)                                | 3.3513(7)                                | 6.84(8)                        | 30.6                          | 24.7                           | 1-x, 1-y, 1-z                                   |
| Cg(5) $\cdots$ Cg(3)           | 3.6757(9)                          | 3.4850(6)                                | 3.3673(6)                                | 5.11(8)                        | 23.6                          | 18.5                           | $-\frac{1}{2}+x, \frac{3}{2}-y, -\frac{1}{2}+z$ |
| Cg(6) $\cdots$ Cg(3)           | 3.8939(10)                         | 3.3515(7)                                | 3.5381(6)                                | 6.84(8)                        | 24.7                          | 30.6                           | 1-x, 1-y, 1-z                                   |

$\alpha$  = Dihedral angle between ring I and ring J (°);  $\beta$  = Cg(I)  $\rightarrow$ Cg(J) or Cg(I)  $\rightarrow$  Me vector and normal to plane I (°);  $\gamma$  = Cg(I)  $\rightarrow$  Cg(J) vector and normal to plane J (°); Cg–Cg = distance between ring centroids (Å); CgI $\cdots$ Perp = perpendicular distance of Cg(I) on ring J (Å); CgJ $\cdots$ Perp = perpendicular distance of Cg(J) on ring I (Å).

Cg(3) = Centre of gravity of ring [N1/C1/C2/C3/C4/C5], Cg(5) = Centre of gravity of ring [N3/C14/C15/C16/C17/C18] and Cg(6) = Centre of gravity of ring [N6/C8/C9/C10/C11/C12]

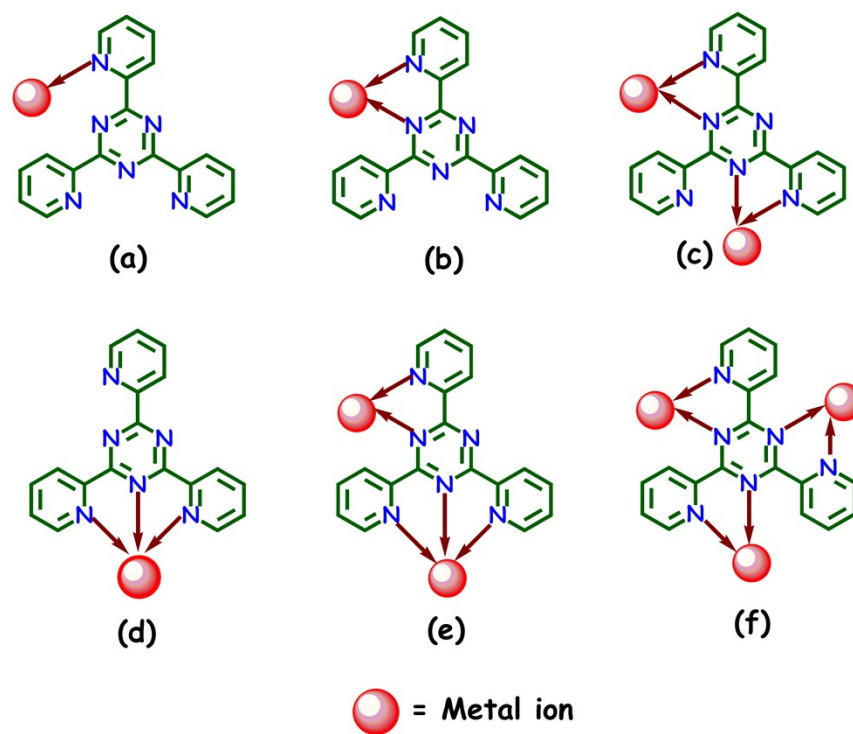

**Scheme S1** Schematic representation of the possible coordination modes of the ligand ‘tptz’

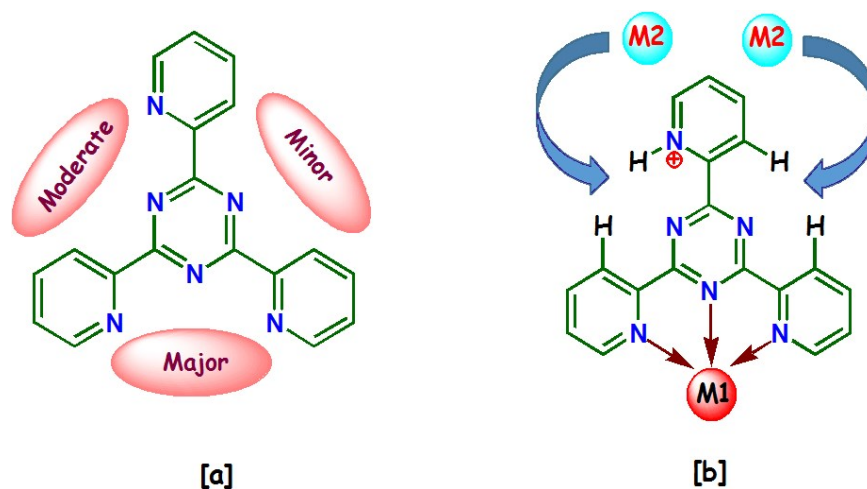

**Scheme S2** [a] Availability and the nature of coronation pockets in tptz and [b] Schematic representation of steric constrain of the protonated ligand ( $\text{Htptz}^+$ ) executed by the hydrogen atoms on the approach of second metal ion (M2) when it is already coordinated to the first metal ion (M1)

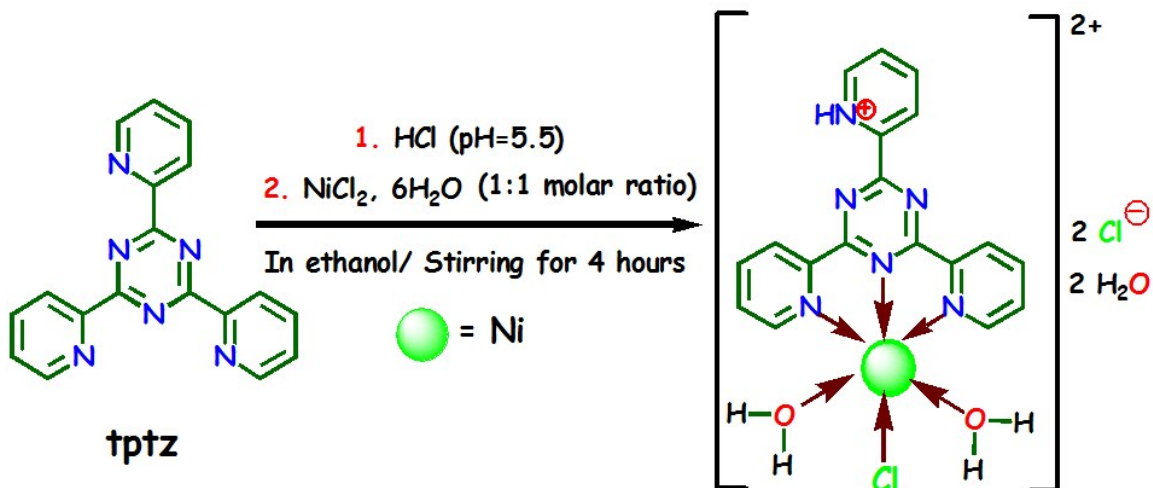

Scheme S3 Schematic representation of the synthesis of complex 1

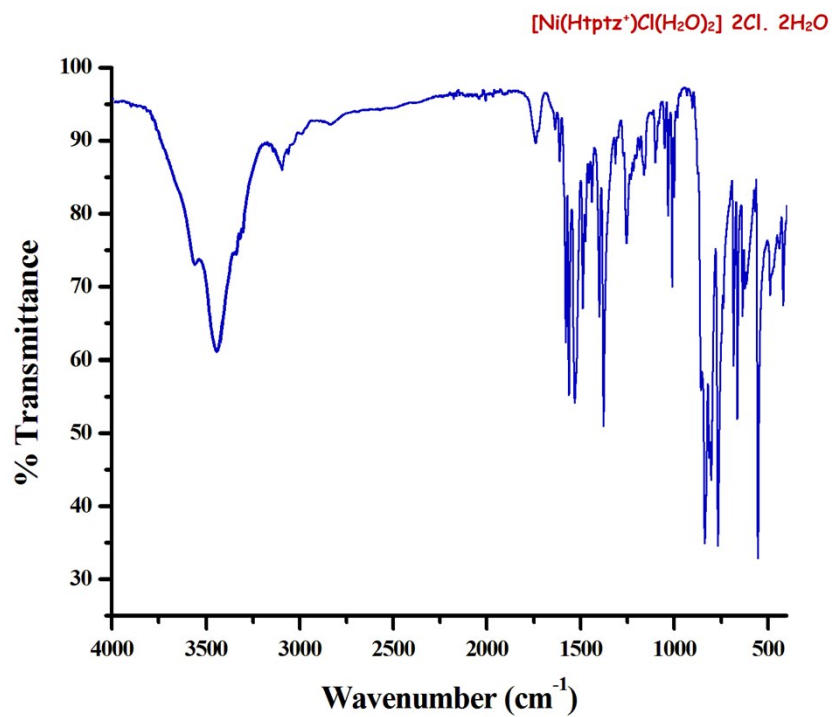

Fig. S1: IR spectrum for Complex 1

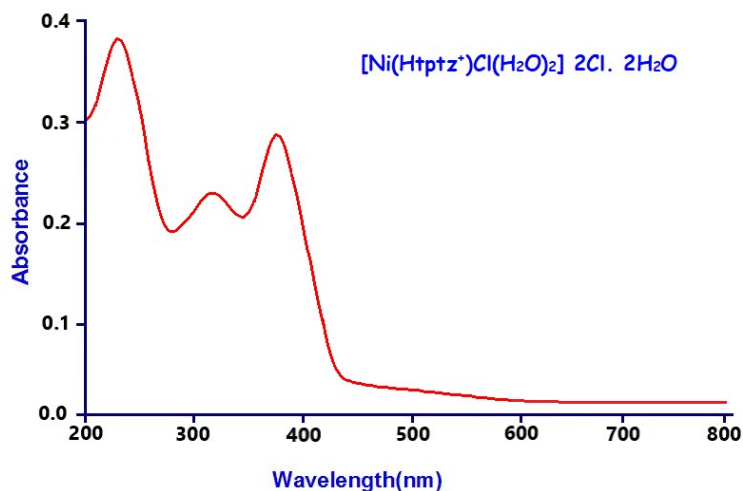

**Fig. S2:** UV-Visible spectrum for Complex **1**

The electronic absorption spectrum of **1** ( $t_{2g}^6e_g^2$  system) has been recorded in methanol and it exhibits three bands at 233 nm, 311 nm and 379 nm. The intense absorption bands seen in the UV ( $\lambda = 200\text{-}400$  nm) region are assigned to ligand-centered  $\pi \rightarrow \pi^*$  and  $n \rightarrow \pi^*$  transitions. The band at 379 nm became slightly broader may be assigned to LMCT. Unfortunately, the expected weak Laporte forbidden transitions in the visible region could not be detected even with concentrated solutions, might be lost in the low energy tail of the charge transfer transitions.<sup>1</sup>

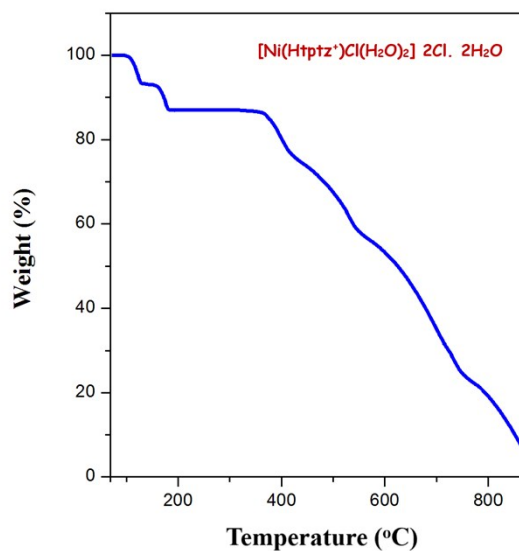

**Fig. S3:** TGA of Complex **1** measured under N<sub>2</sub> atmosphere.
